# Supplementary material
Source: PubMed Central journal article supplement (PMC8176397)
Supplement: ofab235_suppl_supplementary_figure_s1.pdf [file ofab235_suppl_supplementary_figure_s1.pdf]

Supplemental Figure 1  
 Distribution and relationships of Ct values for SARS-CoV-2 and  $\beta$ -actin specimen quality control.

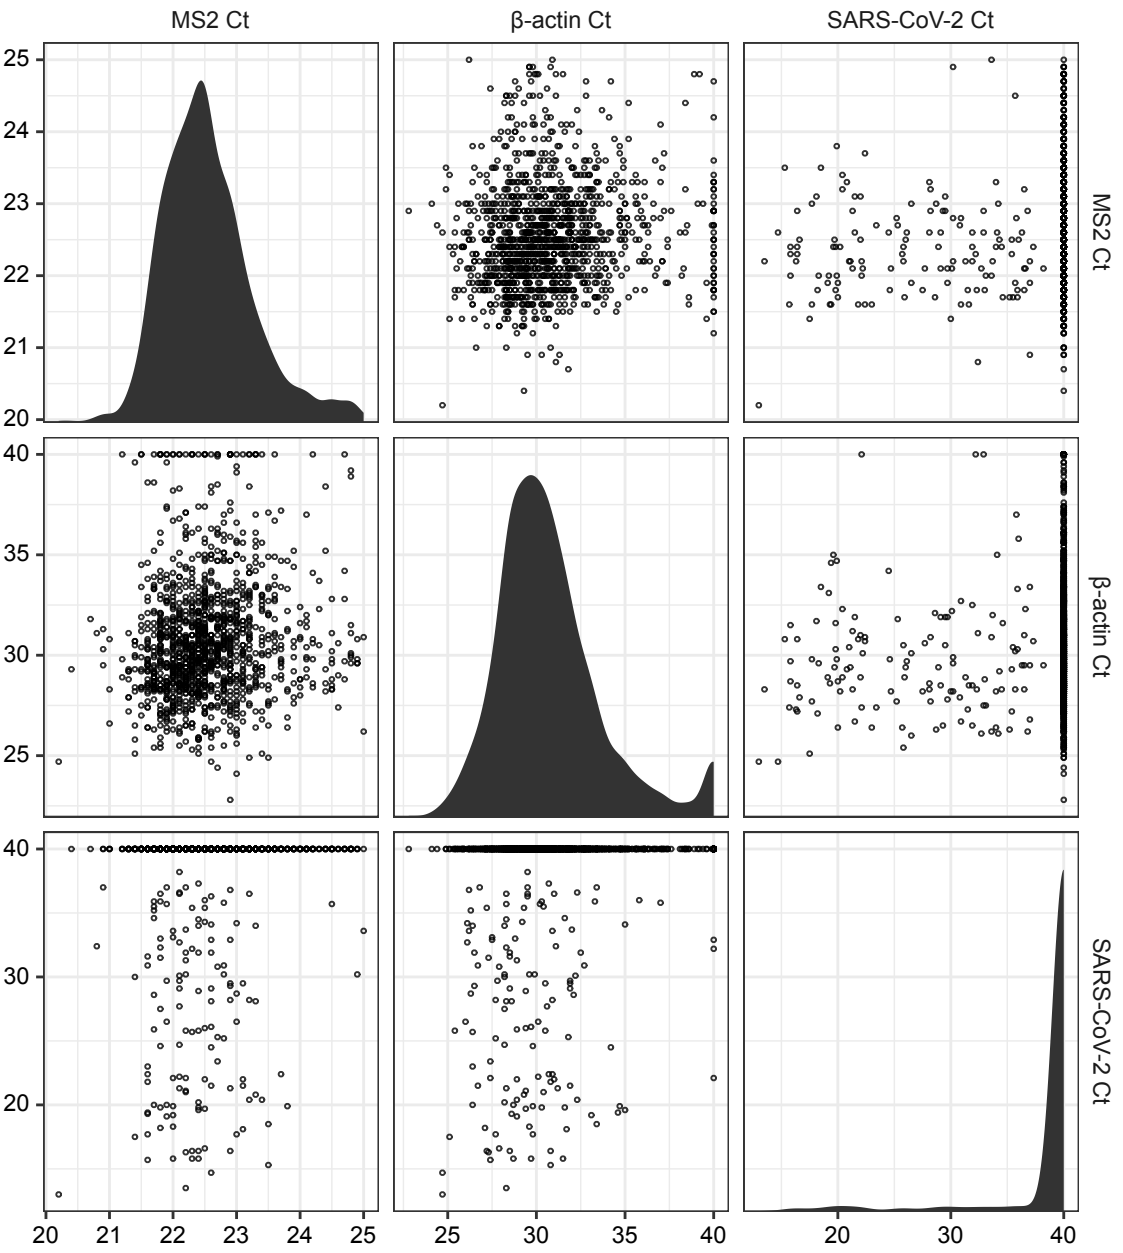

A matrix plot depicting the observed cycle threshold values for SARS-CoV-2 RT-PCR, with MS2 RNA positive control and  $\beta$ -actin specimen quality control over 1282 consecutive clinical assays run between March 26 and July 4, 2020. Panels on the diagonal present the distribution of each target's Ct values. Panels off the diagonal present the relationship between Ct values for each pair of targets. Ct for specimens without detectable SARS-CoV-2 or  $\beta$ -actin were imputed at 40 cycles.
